# Supplementary material
Source: PubMed Central journal article supplement (PMC8179171)

## Supplementary Material and Methods

| REAGENTS or RESOURCES                                | SOURCE                       | IDENTIFIER                      |
|------------------------------------------------------|------------------------------|---------------------------------|
| <b>Antibodies</b>                                    |                              |                                 |
| <b>Mouse monoclonal anti-E-cadherin</b>              | BD Bioscience                | Cat# 610181; RRID: AB_397580    |
| <b>Rabbit monoclonal anti-YAP</b>                    | Cell Signaling<br>Technology | Cat# 14074; RRID: AB_2650491    |
| <b>Rabbit polyclonal anti-Cleaved<br/>Caspase3</b>   | Cell Signaling<br>Technology | Cat# 9661; RRID: AB_2341188     |
| <b>Rabbit monoclonal anti-Ki67</b>                   | Thermo Fisher<br>Scientific  | Cat# 9106; RRID: AB_331768      |
| <b>rabbit polyclonal anti-H3K4me1</b>                | Millipore                    | Cat# 07-436; RRID: AB_10068114  |
| <b>rabbit polyclonal anti-H3K4me2</b>                | Millipore                    | Cat# 07-030; RRID: AB_310342    |
| <b>rabbit polyclonal anti-H3K4me3</b>                | Cell Signaling<br>Technology | Cat# 9727; RRID: AB_561095      |
| <b>Rabbit monoclonal non-<br/>phosphorylated-YAP</b> | Abcam                        | Cat# 205270; RRID: N/A          |
| <b>Rabbit monoclonal anti-NICD</b>                   | Cell Signaling<br>Technology | Cat# 4147; RRID: AB_2153348     |
| <b>Mouse monoclonal anti-tubulin</b>                 | Sigma Aldrich                | Cat# T9026; RRID: AB_477593     |
| <b>Mouse monoclonal anti-p53</b>                     | Millipore                    | Cat# OP43-20UG; RRID: AB_564968 |
| <b>Rabbit monoclonal anti-MII1</b>                   | Cell Signaling<br>Technology | Cat# 14197; RRID: AB_2688010    |

|                                             |                              |                                    |
|---------------------------------------------|------------------------------|------------------------------------|
| <b>Rabbit monoclonal anti-hMII2</b>         | Cell Signaling<br>Technology | Cat# 63735; RRID: AB_2737357       |
| <b>Rabbit monoclonal anti-Wdr5</b>          | Cell Signaling<br>Technology | Cat# 13105; RRID: AB_2620133       |
| <b>Rabbit monoclonal anti-Ash2l</b>         | Cell Signaling<br>Technology | Cat# 5019; RRID: AB_1950350        |
| <b>Rabbit polyclonal anti-Erk1/2</b>        | Cell Signaling<br>Technology | Cat# 9102; RRID: AB_330744         |
| <b>Mouse monoclonal anti-pErk1/2</b>        | Sigma Aldrich                | Cat# M9692; RRID: AB_260729        |
| <b>Mouse monoclonal anti-Mek1</b>           | Cell Signaling<br>Technology | Cat# 4694; RRID: AB_10695868       |
| <b>Rabbit monoclonal anti-pMek1</b>         | Cell Signaling<br>Technology | Cat# 9154; RRID: AB_2138017        |
| <b>isotype IgG control</b>                  | Cell Signaling<br>Technology | Cat# 3900 ; RRID: AB_1550038       |
| <b>Rabbit polyclonal anti-MII2</b>          | 1                            | N.A.                               |
| <b>Donkey anti-rabbit-Cy3</b>               | Dianova                      | Cat# 111-165-144; RRID: AB_2338006 |
| <b>Donkey anti- rabbit -Cy3</b>             | Dianova                      | Cat# 711-546-152; RRID: AB_2340619 |
| <b>Donkey anti-mouse-AlexaFluor<br/>488</b> | Dianova                      | Cat# 715-545-151; RRID: AB_2341099 |
| <b>Anti-rabbit-HRP-conjugated</b>           | Agilent                      | Cat# K4003; RRID: AB_2630375       |
| <b>goat-anti-rabbit-HRP-conjugated</b>      | Dianova                      | Cat# 111-035-144; RRID: AB_2307391 |
| <b>goat-anti-mouse-HRP-conjugated</b>       | Dianova                      | Cat# 115-035-062; RRID: AB_2338504 |

**Chemicals, Peptides, and Recombinant Proteins**

|                    |               |              |
|--------------------|---------------|--------------|
| <b>Matrigel</b>    | Corning       | Cat# 356231  |
| <b>Wnt3a</b>       | R&D           | Cat# 1324-WN |
| <b>Y-27632</b>     | Sigma Aldrich | Cat# A9165   |
| <b>Tryplex</b>     | GIBCO         | Cat# 12563   |
| <b>MI-2</b>        | Selleckchem   | Cat# S7618   |
| <b>Verteporfin</b> | Sigma Aldrich | Cat# SML0534 |
| <b>SCH772984</b>   | Selleckchem   | Cat# S7101   |
| <b>DAPT</b>        | Sigma Aldrich | Cat# D5942   |
| <b>U0126</b>       | Calbiochem    | Cat# 662005  |
| <b>PP2</b>         | Sigma         | Cat# P0042   |
| <b>XMU-MP-1</b>    | TargetMol     | Cat# T4212   |
| <b>mEGF</b>        | Gibco         | Cat# PMG8043 |
| <b>mNoggin</b>     | Peptotech     | Cat# 250-38  |
| <b>hR-Spondin1</b> | Peptotech     | Cat# 120-38  |
| <b>hEGF</b>        | Invitrogen    | Cat# PHG0311 |

|                                      |                   |                  |
|--------------------------------------|-------------------|------------------|
| <b>hNoggin</b>                       | Peprotech         | Cat# 120-10      |
| <b>sWnt</b>                          | U-Protein Express | Cat# N001        |
| <b>SB202190</b>                      | Sigma Aldrich     | Cat# S7067       |
| <b>A83-01</b>                        | Merck             | Cat# 616454      |
| <b>CHIR-99021</b>                    | Selleckchem       | Cat# S1263       |
| <b>Primocin</b>                      | Invivogen         | Cat# ant-pm      |
| <b>4-hydroxy-tamoxifen</b>           | Sigma Aldrich     | Cat# 94873       |
| <b>AdvancedDMEM/F12</b>              | Gibco             | Cat# 12634-010   |
| <b>AdvancedDMEM</b>                  | Gibco             | Cat# 12491-015   |
| <b>F12 medium</b>                    | Gibco             | Cat# 31765-027   |
| <b>N-Acetylcysteine</b>              | Gibco             | Cat# A9165       |
| <b>GlutaMax</b>                      | Gibco             | Cat# 35050-038   |
| <b>Nicotinamide</b>                  | Sigma             | Cat# N0636       |
| <b>HEPES</b>                         | Gibco             | Cat# 15630-056   |
| <b>N2</b>                            | Gibco             | Cat# 17502048    |
| <b>B27</b>                           | Gibco             | Cat# 17504       |
| <b>cOmplete (protease inhibitor)</b> | Sigma Aldrich     | Cat# 11836170001 |
| <b>Phosphatase inhibitor 2</b>       | Sigma Aldrich     | Cat# P0044       |
| <b>Phosphatase inhibitor 3</b>       | Sigma Aldrich     | Cat# P5726       |



|                                                                                                                       |                                |                |
|-----------------------------------------------------------------------------------------------------------------------|--------------------------------|----------------|
| <b>Transdux</b>                                                                                                       | SBI-System<br>Bioscience       | Cat# LV850 A-1 |
| <b>doxycycline</b>                                                                                                    | LKT Laboratories,              | Cat# D5897     |
| <b>immo-mount</b>                                                                                                     | Thermofisher                   | Cat# 9990402   |
| <b>Lenti-X Concentrator</b>                                                                                           | Takara                         | Cat# 631231    |
| <b>PEI</b>                                                                                                            | Polyscience Europe             | Cat# 24765-2   |
| <b>Dynabeads</b>                                                                                                      | Sigma Aldrich                  | Cat# 10003D    |
| <b>Experimental Models: Organisms/Strains</b>                                                                         |                                |                |
| <b>Mouse B6: <i>VillinCre<sup>ERT2</sup></i>;<br/><i>NICD<sup>flox/flox</sup></i>; <i>p53<sup>flox/flox</sup></i></b> | 2                              | N/A            |
| <b>Human cancer organoids</b>                                                                                         | 3, 4                           | N/A            |
| <b>Human naïve wt organoids</b>                                                                                       | 5                              | N/A            |
| <b>Oligonucleotides</b>                                                                                               |                                |                |
| <b>shRNA for knockdown, suppl.<br/>table 1</b>                                                                        | 6                              | N/A            |
| <b>Primers for RT-qPCR, suppl. table<br/>2</b>                                                                        | This study and <sup>7, 8</sup> | N/A            |
| <b>Vector/Plasmids</b>                                                                                                |                                |                |
| <b>pInducer11</b>                                                                                                     | 9                              | Addgene: 44363 |
| <b>pInducer20</b>                                                                                                     | 9                              | Addgene: 44012 |
| <b>pInducer11-shMII1</b>                                                                                              | This study                     | N/A            |
| <b>pInducer11-shYap (1)</b>                                                                                           | This study                     | N/A            |

|                                                                  |            |                                                                                                                                                                                                                                           |
|------------------------------------------------------------------|------------|-------------------------------------------------------------------------------------------------------------------------------------------------------------------------------------------------------------------------------------------|
| pInducer11-shYap (2)                                             | This study | N/A                                                                                                                                                                                                                                       |
| <b>Deposited Data</b>                                            |            |                                                                                                                                                                                                                                           |
| RNA-seq data                                                     | This paper | E-MTAB-6588                                                                                                                                                                                                                               |
| YAP targets                                                      | 10         |                                                                                                                                                                                                                                           |
| intestinal stem cell signature                                   | 11         |                                                                                                                                                                                                                                           |
| Cell type specific signature<br>(goblet, Paneth and enterocytes) | 12         |                                                                                                                                                                                                                                           |
| Enteroendocrine gene set                                         | GO:0035883 |                                                                                                                                                                                                                                           |
| Fetal/regenerative signature                                     | 13, 14     |                                                                                                                                                                                                                                           |
| <b>Critical Commercial Assays</b>                                |            |                                                                                                                                                                                                                                           |
| TruSeq stranded mRNA library<br>preparation k                    | Illumina   | 20020594                                                                                                                                                                                                                                  |
| pENTR/D-TOPO Cloning                                             | Invitrogen | Cat# K240020                                                                                                                                                                                                                              |
| <b>Software and Algorithms</b>                                   |            |                                                                                                                                                                                                                                           |
| R                                                                |            | R v3.4                                                                                                                                                                                                                                    |
| consensusPathDB webtool                                          |            | <a href="http://cpdb.molgen.mpg.de/MCPDB">http://cpdb.molgen.mpg.de/MCPDB</a>                                                                                                                                                             |
| FASTQC                                                           |            | Andrews S. (2010). FastQC: a quality control tool for high throughput sequence data. Available online at: <a href="http://www.bioinformatics.babraham.ac.uk/projects/fastqc">http://www.bioinformatics.babraham.ac.uk/projects/fastqc</a> |
| STAR aligner                                                     |            | <a href="https://www.ncbi.nlm.nih.gov/pubmed/23104886">https://www.ncbi.nlm.nih.gov/pubmed/23104886</a>                                                                                                                                   |
| DESeq2                                                           |            | RRID:SCR_015687;<br><a href="https://genomebiology">https://genomebiology</a> .                                                                                                                                                           |

|                               |                                                 |                                                                                                                                                                                              |
|-------------------------------|-------------------------------------------------|----------------------------------------------------------------------------------------------------------------------------------------------------------------------------------------------|
|                               |                                                 | biomedcentral.com/articles/10.1186/s13059-014-0550-8                                                                                                                                         |
| <b>featureCounts software</b> |                                                 | Liao Y, Smyth GK and Shi W. <a href="#">featureCounts: an efficient general-purpose program for assigning sequence reads to genomic features.</a> <i>Bioinformatics</i> , 30(7):923-30, 2014 |
| <b>Fiji imageJ</b>            | <a href="https://fiji.sc/">https://fiji.sc/</a> | N/A                                                                                                                                                                                          |
| <b>Imaris 8</b>               | Bitplane                                        | N/A                                                                                                                                                                                          |
| <b>GraphPadprims</b>          | GraphPad                                        | N/A                                                                                                                                                                                          |

### *Organoid culture*

All mice were bred in pathogen-free conditions, and care and use of animals were performed according to the European and National regulations, published in the Official Journal of the European Union L 276/33, September 22, 2010.

The mice have been previously described in <sup>2</sup>. Dissected small intestines of *VillinCre<sup>ERT2</sup>; NICD<sup>flox/flox</sup>; p53<sup>flox/flox</sup>* mice were washed with cold PBS and opened longitudinally. Villi were reduced by scraping the intestinal inside with a glass coverslip. The small intestines were cut into 5mm pieces and washed with cold PBS until the supernatant was clear. Pieces were transferred to 8mM EDTA/PBS for 5 min at RT prior to 20 min incubation in 2mM EDTA/PBS on a wheel at 4°C. By careful pipetting and shaking, the epithelia were dissociated from the intestinal pieces, and crypt-enriched fractions were collected. Selected fractions were washed once with 0.1% BSA/PBS and applied onto a 70 µm filter. 200 crypts were seeded in 25 µl of growth factor-reduced Matrigel (BD Matrigel #356231) in a 48-well plate. The basic crypt medium consisted of 60/40 AdvancedDMEM/F12 medium supplemented with N2 and B27, HEPES, GlutaMax, N-Acetylcysteine and Penicillin/Streptomycin (Gibco). The medium to culture control organoids was further supplemented with final concentrations of 50ng/ml mEGF (Gibco, PMG8043), 100 ng/ml mNoggin (Peprotech, 250-38) and 200ng/ml hR-Spondin1 (Peprotech, 120-38). Organoids were split every 6 days by mechanical dissociation with a BSA-coated fire-polished Pasteur pipette. Cre-mediated recombination was induced by 400nM 4-hydroxy-

tamoxifen (Sigma, 94873) for 1 day. *NICD/p53<sup>-/-</sup>* organoids were further cultured with basic crypt medium (see above) and split every 3-4 days by single-cell suspension with 3 min incubation in TripLE (Invitrogen) at 37°C, followed by washing with 0.1% BSA/PBS. Organoids were treated with 0.5-2.5 µM of Verteporfin, VP (SML0534, Sigma), 0.05-1.5 µM Menin inhibitor, MI-2 (S7618, Selleckchem), 100-500 nM SCH772984 (S7101, Selleckchem), 10µM U0126 (Calbiochem), 15µM DAPT (D5942, Sigma) for the indicated times.

The human wt organoid culture has been previously described<sup>5</sup>. In brief, human colon organoid lines were cultured in Advanced Dulbecco's Modified Eagle's Medium/F12 (#12634, Gibco) containing 10 mM HEPES, 2 mM GlutaMAX, 1.25 mM N-acetylcysteine and 25% R-spondin1 conditioned medium, 1x B-27, 1x N2, 500 nM A83-01, 1 mM nicotinamide and 100 µg/ml primocin (#ant-pm, Invivogen) was supplemented with (N0636, Sigma), 10 µM SB202190 (#S7067, Sigma), 3 µM CHIR-99021 (#S1263, Selleckchem), 0.328 nM sWnt (#N001, U-Protein Express), 50 ng/ml hEGF (#PHG0311, Invitrogen) and 100 ng/ml hNoggin (#120-10C, Peprotech).

#### *Generation of lentiviral particles*

For doxycycline-inducible expression shRNA, in combination with a fluorescent reporter, vectors of the pInducer tool kit were used<sup>9</sup>. shRNAs targeting Yap and Mll1, designed to contain the optimized mir30 backbone (Suppl. table 1,<sup>6</sup>) were subsequently cloned into pInducer10 and pInducer11. For production of lentiviral particles, 293TN cells were co-transfected with 10 µg psPAX2, 2.5 µg pMD2.G and 10 µg lentiviral vector on a 10 cm dish by lipofectation using PEI (Sigma). Supernatants were harvested after 24 and 48 h of transfection and passed through a 0.45 mm diameter pore filter. Viral particles were concentrated with Lenti-X Concentrator (Takara) and re-suspended in basic crypt medium.

#### *Infection of organoids with lentiviral particles*

Organoids were isolated from Matrigel, washed, dissociated with TripLE, and washed again with 0.1% BSA/PBS. Supernatant was removed and cells were re-suspended and mixed with viral particles in basic crypt medium supplemented with 200 ng/ml hRspo1 (Peprotech), 400 µM hWnt3a, 10 mM nicotinamide, 10 µM Y27632 and transdux (System Bioscience), and transferred to a polyhema-coated 48-well dish and spin-occulated for 45 min at 1000 rpm before incubation for 5 h in the cell culture

incubator. Infectious cell solutions were washed with 1 ml of 0.1% BSA/PBS, seeded in Matrigel and cultured in basic crypt medium for 1 day before selection with 1 µg/ml puromycin or 200 µg/ml G418. Stable organoids were induced by 600 ng/ml doxycycline (LKT Laboratories, D5897).

#### *Histology and immunohistochemistry staining and analysis*

Organoids were fixed with ice-cold 4 % formalin-PBS solution for 1 h, either in Matrigel for whole-mount staining or processed for paraffin-embedding in 1.5 % agarose. The pieces of agarose were dehydrated in ethanol and toluol before transfer into paraffin. Formalin fixed and paraffin-embedded tumor samples were kindly provided by Robine and Louvard <sup>2</sup>. 5 µm sections of paraffin-embedded samples were de-paraffinized and rehydrated before being subjected to antigen retrieval with 20 mM Tris pH 8.5 and 1 mM EDTA by boiling for 18 min. For immunohistochemistry, sections were incubated for 5min in 4% H<sub>2</sub>O<sub>2</sub>/PBS before 1h incubation with blocking solution (0.1% Tween, 10% horse serum in PBS) and for immunofluorescence staining, slides were incubated for 1 h with a blocking solution (0.1% TritonX, 10% horse serum in PBS) followed by overnight incubation of the primary antibody at 4 °C. After washing with 0.1 % Tween/PBS, slides for immunofluorescence were incubated with fluorochrome-conjugated secondary antibodies and 4',6-diamidino-2-phenylindole for 1 h and mounted in immo-mount (Thermofisher). For immunohistochemistry slides were incubated with HRP-conjugated antibody and developed with a chromogenic substrate (DAB) according to the manufacturer's protocol (DAKO), and counterstained with hematoxylin staining.

#### *Light microscopy and data analysis*

Growth of individual organoids was tracked with a Leica DIM6000 microscope equipped with an NPlan 10x NA 0.25 or NCX FLPlan 5x NA 0.12 objective and a motorized LMT200 V3 High precision Scanning Stage to relocate previously stored positions.

Representative z-stacks from immunofluorescence procedures were acquired with either an inverted laser scanning microscope LSM710 using an 405 nm, 488 nm and 561 nm laser and an PlanApochromat 20x NA 0.8 objective (Zeiss Jena, Germany) and voxel size of 0.19µm x 0.19µm x 0.73µm or a spinning disc confocal microscope CSU-W1 (Nikon/Andor) equipped with an iXON888 camera, using PlanApo 20x NA

0.75 and Apo LWD 40x NA 1.15 objectives. For quantifications, complete z-stacks of the organoids without intensity saturations were acquired under identical conditions.

Images were analyzed with Fiji and Imaris 8 (Bitplane/Andor) software. The Fiji ROI manager plugin was used to quantify the growth of the organoids over time. To quantify the mean fluorescence intensity of the specified signals in the 3D reconstructed organoids, segmentation in the Surface module of Imaris was used by selection of nuclear fluorescence in a mask created with the DAPI channel.

Graphs and statistics were generated with GraphPad Prism. Tests for normal distribution were performed with D'Agostino-Pearson and Shapiro-Wilk tests: data were shown in a boxplot, and significance (p value) was determined with Mann-Whitney test (two-tailed) or students T-test.

### *Electron Microscopy*

Organoids were fixed in 2 % (w/v) formaldehyde and 2.5 % (v/v) glutaraldehyde in 0.1 M phosphate buffer for 2 h at room temperature. After embedding in 10 % gelatin, samples were post-fixed with 1 % (v/v) osmium tetroxide, dehydrated in a graded series of ethanol, and embedded in PolyBed® 812 resin (Polysciences, Germany). Ultrathin sections (60-80 nm) were stained with uranyl acetate and lead citrate, and examined at 80 kV with a Morgagni electron microscope (FEI, Holland). Acquisition of pictures was done with a Morada CCD camera and the iTEM software (Emsis GmbH, Germany).

### *Western blots*

Organoids were harvested and washed once in ice-cold 0.1% BSA/PBS followed by two washings in ice-cold PBS. Cells were lysed in RIPA buffer (50mM Tris, pH8, 150mM NaCl, 0.1 % SDS, 1 % NP40, 0.5 % Deoxycholate), extracts were separated on 10 % polyacrylamide gels and transferred to a nitrocellulose membrane via semidry transfer (25 mM Tris, 192mM glycine, 20% methanol, pH 8,3). For detection of large proteins, such as MII1 and mMII2, proteins were transferred to a nitrocellulose membrane via wet transfer (25 mM Tris, 192mM glycine, 0.35mM SDS, 20% methanol).

### *Co-immunoprecipitation*

Organoids were harvested and 5x washed in ice cold PBS before lysis in IP-buffer (139 mM KCl, 12 mM NaCl, 0.8 mM MgCl<sub>2</sub>, 20 mM Tris- HCl [pH7.5], 0.5% IGEPAL

CA-630, 0.2 mM EDTA, 20% [v/v] glycerol, 1 mM DTT, protease and phosphatase inhibitors. After brief sonication, benzonase (25U/ml) was added and incubated for 10min on ice, followed by 10min centrifugation (14000rpm, at 5°C). 400µg of organoid protein lysate in total volume of 300µl was incubated with 0.5µg Mll1 or Yap antibody (NEB: 14197S (Clone D6G8N), NEB:14074S (Clone D8H1X)) and isotype IgG control (NEB: 3900 (DA1E)) over night. 20µl Dynabeads (Thermofisher) was washed three times, and after 1h blocking in 0.1% BSA/PBS lysates were added and incubated at 4°C rotating for 4h. Dynabeads were washed 5 times with lyses buffer and finally cooked for 5min at 96°C with SDS-Page loading buffer.

#### *qRT-PCR and RNA-sequencing*

Organoids were harvested and washed with 0.1 % BSA/PBS, and total RNA was isolated using Trizol extraction (Invitrogen). DNA contaminations were removed by DNase1 digestion (Invitrogen) in the presence of Rnase Inhibitor (RNase Out, Invitrogen), followed by RNA purification via phenol/chloroform extraction.

For qRT-PCR, 5 µg of extracted RNA was reverse-transcribed with random hexamer primers (Invitrogen) and MMLV reverse Transcriptase (Promega, 200U/µl), following the manufacturer's instructions. Quantitative reverse transcription PCR was performed in a total volume of 20 µl SybR green reaction mix (Roche, Diagnostics) containing 0.25 µM of each primer (see suppl. table 2) in a CFX96-C1000T thermal cycler (BioRad). The PCR program included an activation step at 50 °C for 2 min, a denaturation step at 95 °C for 2 min followed by 40 cycles of 95 °C for 15 s, and a combined annealing and elongation step at 60 °C for 1 min. All reactions were performed as quadruplicates. The quantification was performed using the  $\Delta\Delta C_t$  method by comparing the expression of the target genes of treated versus control samples, relative to the endogenous reference *GAPDH*. Expression data from MI-2 treatment were relative to the endogenous reference *B2M*. Data are expressed as mean  $\pm$  SD. Differences between two groups were determined by Student's t-test.  $P < 0.05$  was considered significant; \*,  $p \leq 0.05$ , \*\*,  $p \leq 0.001$ , \*\*\*,  $p \leq 0.0001$ .

To perform mRNA sequencing, RNA was extracted from control and *NICD/p53<sup>-/-</sup>* organoids, as described above. RNA was collected from two technical replicates of three individual biological replicates. Sequencing libraries were generated using the Illumina TruSeq Stranded mRNA Kit, and samples were processed in two pools with HiSeq 4000 in one run (1 pool - 1 lane). RNA-seq reads were quality-checked by

FASTQC (v0.11.5) software. Sequencing reads were mapped to the mouse whole genome (mm10) using STAR aligner (v. 2.5.3a). Read counts for each gene (gencode vM12) were extracted from the BAM file using featureCounts software (1.5.1). Read counts from different biological groups were subjected to differential expression analysis using the DESeq2 R statistical package. Comparisons between controls and mutants were corrected by individual technical replicates (linear model). In order to avoid background signal/noise, genes with less than 10 reads over all samples were excluded before adjusting the p-value for multiple testing. Genes with adjusted p-value lower than 0.01 and absolute fold-change (log2) higher than 0.4 were considered differentially expressed. Heatmaps were generated by gplots heatmap.2; before plotting the expression values were log transformed and scaled by z-transformation. Volcano plots were generated with R. Violin plots were generated with ggplot2.violinplot function from ggplot2 R package and tested for the differential expression of cell type specific <sup>29</sup>, stem cell <sup>11</sup> and fetal/regenerative gene set <sup>13</sup>. RNA-seq sample files were submitted to ExpressArray (accession number: E-MTAB-6588)



## Supplemental tables

### Supplemental table 1

| shRNA sequences |                                                                                                       |
|-----------------|-------------------------------------------------------------------------------------------------------|
| <i>targets</i>  | <i>shRNA, 97 oligomer</i> <sup>6</sup>                                                                |
| hMll1           | TGCTGTTGACAGTGAGCGAAAGAAAGATTCTAAAAGTATATAGTGAAGCCACAGATGTATATAC<br>TTTTAGAATCTTTCTTCTGCCTACTGCCTCGGA |
| mYap            | TGCTGTTGACAGTGAGCGCAGGGTTCATAATGAACAACAATAGTGAAGCCACAGATGTATTGT<br>TGTTCAATTATGAACCCTTGCCTACTGCCTCGGA |
| mYap            | TGCTGTTGACAGTGAGCGATAGAACAGAGATGAAATTCTATAGTGAAGCCACAGATGTATAGA<br>ATTCATCTCTGTTCTACTGCCTACTGCCTCGGA  |

Suppl. table 1: shRNA sequences: cloned into pInducer10/11

### Supplemental table 2

| Primers for RT-qPCR       |                  |                           |               |
|---------------------------|------------------|---------------------------|---------------|
| <i>targets</i>            | <i>Direction</i> | <i>Oligo 5' → 3'</i>      | <i>source</i> |
| <b>Gapdh</b>              | fwd              | AAATGGTGAAGGTCGGTGTGAACG  | <sup>7</sup>  |
| <b>Gapdh</b>              | rev              | TGATGACAAGCTTCCCATTCTCGG  | <sup>7</sup>  |
| <b>Beta-microglobulin</b> | fwd              | GTAAAGTGGGATCGAGACATGTAAG | This study    |
| <b>Beta-microglobulin</b> | rev              | TAGAGCTACCTGTGGAGCAA      | This study    |
| <b>Hey1</b>               | fwd              | TCTTGCAGATGACTGTGGATCACC  | This study    |
| <b>Hey1</b>               | rev              | AGGCATCGAGTCCTTCAATGATGC  | This study    |
| <b>Yap</b>                | fwd              | AAGGCTGGACCCTCGTTTTG      | <sup>8</sup>  |
| <b>Yap</b>                | rev              | TCCGTATTGCCTGCCGAAAT      | <sup>8</sup>  |

|                 |     |                          |                    |
|-----------------|-----|--------------------------|--------------------|
| <b>MII1</b>     | fwd | GCTCAGATGAAGAAGTCAGAG    | (Francis Stewart)  |
| <b>MII1</b>     | rev | GGGAAAACACAGATGGGTCTG    | (Francis Stewart)  |
| <b>MII2</b>     | fwd | ATGGTTCCTCAGACCTACTG     | (Zhu et al., 2019) |
| <b>MII2</b>     | rev | TCCACACTGAAGCCATCATC     | (Zhu et al., 2019) |
| <b>Ctgf</b>     | fwd | GGGCCTCTTCTGCGATTTTC     | 8                  |
| <b>Ctgf</b>     | rev | ATCCAGGCAAGTGCATTGGTA    | 8                  |
| <b>Ankrd1</b>   | fwd | GGATGTGCCGAGGTTTCTGAA    | 8                  |
| <b>Ankrd1</b>   | rev | GTCCGTTTATACTCATCGCAGAC  | 8                  |
| <b>Cyr61</b>    | fwd | CTGCGCTAAACAACCTCAACGA   | 8                  |
| <b>Cyr61</b>    | rev | GCAGATCCCTTTTCAGAGCGG    | 8                  |
| <b>Igfbp3</b>   | fwd | TCTAAGCGGGAGACAGAATACG   | 8                  |
| <b>Igfbp3</b>   | rev | CTCTGGGACTCAGCACATTGA    | 8                  |
| <b>Lysozyme</b> | fwd | GCAGCCATACAATGTGCAAAGAGG | 7                  |
| <b>Lysozyme</b> | rev | TTTGCCCTGTTTCTGCTGAAGTCC | 7                  |
| <b>ChroA</b>    | fwd | AGAAGTGTTTGAGAACCAGAGCCC | 7                  |
| <b>ChroA</b>    | rev | TTGGTGATTGGGTATTGGTGGCTG | 7                  |
| <b>Gob5</b>     | fwd | TGAAATTGTGCTGCTGACCGATGG | 7                  |
| <b>Gob5</b>     | rev | TGCTGCGAAAGCATCAACAAGACC | 7                  |
| <b>Math1</b>    | fwd | GTTGCGCTCACTCACAAATAAGGG | 7                  |
| <b>Math1</b>    | rev | TGGCAGTTGAGTTTCTTCAAGGCG | 7                  |
| <b>Ascl2</b>    | fwd | AAAGCTTGGTCCGGTTCTTCATCC | 7                  |
| <b>Ascl2</b>    | rev | GCAGATGCTTAGCTTATTGCGTCC | 7                  |

|               |     |                           |            |
|---------------|-----|---------------------------|------------|
| <b>Lgr5</b>   | fwd | CCTACTCGAAGACTTACCCAGT    | 7          |
| <b>Lgr5</b>   | rev | GCATTGGGGTGAATGATAGCA     | 7          |
| <b>Bmi1</b>   | fwd | AAAGGTACTTACGATGCCCAGCAG  | This study |
| <b>Bmi1</b>   | rev | AAGGTAGTGGGCCATTTCTTCTCC  | This study |
| <b>Tert</b>   | fwd | TGAGGTGCAGCGGGATGGGTT     | This study |
| <b>Tert</b>   | rev | TCCAGCAGCAAGCCACACCAG     | This study |
| <b>Clu</b>    | fwd | AAAGGGGGTGTACTTGAGCAG     | This study |
| <b>Clu</b>    | rev | ACCTACTCCCTTGAGTGGACA     | This study |
| <b>Trop2</b>  | fwd | GAACGCGTCGCAGAAGGGC       | 15         |
| <b>Trop2</b>  | rev | CGGCGGCCCATGAACAGTGA      | 15         |
| <b>Anxa1</b>  | fwd | TGATACAGATGCCAGGGCTTT     | This study |
| <b>Anxa1</b>  | rev | TCGGCAAAGAAAGCTGGAGT      | This study |
| <b>Spp1</b>   | fwd | TCGGAGGAAACCAGCCAAGGACT   | 15         |
| <b>Spp1</b>   | rev | AAGCTTCTTCTCCTCTGAGCTGCCA | 15         |
| <b>Egr1</b>   | fwd | ACAACCCTATGAGCACCTGAC     | This study |
| <b>Egr1</b>   | rev | GGTCGGAGGATTGGTCATGC      | This study |
| <b>Ly6a</b>   | fwd | GCTGATTCTTCTTGTGGCCC      | This study |
| <b>Ly6a</b>   | rev | GAGGGCAGATGGGTAAGCAA      | This study |
| <b>hCLU</b>   | fwd | TGTTCCACCAACAACCCCTC      | This study |
| <b>hCLU</b>   | rev | GGAAGGAACGTCCGAGTCAG      | This study |
| <b>hHEY1</b>  | fwd | TGAGAAGCAGGTAATGGAGCAA    | This study |
| <b>hHEY1</b>  | rev | CGCTGGGAAGCGTAGTTGTT      | This study |
| <b>hTROP2</b> | fwd | CCAAGTGAGTCACGCTTCT       | This study |
| <b>hTROP2</b> | rev | CGCTATGCCATCCCTTCTT       | This study |

|                            |     |                            |            |
|----------------------------|-----|----------------------------|------------|
| <b>hANXA1</b>              | fwd | AGTTCTTTGCAAGAAGGTAGAGA    | This study |
| <b>hANXA1</b>              | rev | TGACGCTGTGCATTGTTTCG       | This study |
| <b>hMUC2</b>               | fwd | TTTGATGCCAGCATTTCATCCCG    | 7          |
| <b>hMUC2</b>               | rev | TTGGCCGAGTACATGACAAATGTCCC | 7          |
| <b>hBeta-microglobulin</b> | fwd | GTTAAGTGGGATCGAGACATGTAAG  | This study |
| <b>hBeta-microglobulin</b> | rev | TAGAGCTACCTGTGGAGCAA       | This study |

*Suppl. table 2: primer list; designed and validated primer pairs*

## References suppl. Information

1. Glaser, S. *et al.* Multiple epigenetic maintenance factors implicated by the loss of Mll2 in mouse development. *Development* **133**, 1423-1432 (2006).
2. Chanrion, M. *et al.* Concomitant Notch activation and p53 deletion trigger epithelial-to-mesenchymal transition and metastasis in mouse gut. *Nat Commun* **5**, 5005 (2014).
3. Boehnke, K. *et al.* Assay Establishment and Validation of a High-Throughput Screening Platform for Three-Dimensional Patient-Derived Colon Cancer Organoid Cultures. *J Biomol Screen* **21**, 931-941 (2016).
4. Schutte, M. *et al.* Molecular dissection of colorectal cancer in pre-clinical models identifies biomarkers predicting sensitivity to EGFR inhibitors. *Nat Commun* **8**, 14262 (2017).
5. Heuberger, J. *et al.* Epithelial response to IFN-gamma promotes SARS-CoV-2 infection. *EMBO Mol Med*, e13191 (2021).
6. Fellmann, C. *et al.* An optimized microRNA backbone for effective single-copy RNAi. *Cell Rep* **5**, 1704-1713 (2013).
7. Heuberger, J. *et al.* Shp2/MAPK signaling controls goblet/paneth cell fate decisions in the intestine. *Proc Natl Acad Sci U S A* **111**, 3472-3477 (2014).
8. von Eyss, B. *et al.* A MYC-Driven Change in Mitochondrial Dynamics Limits YAP/TAZ Function in Mammary Epithelial Cells and Breast Cancer. *Cancer Cell* **28**, 743-757 (2015).
9. Meerbrey, K.L. *et al.* The pINDUCER lentiviral toolkit for inducible RNA interference in vitro and in vivo. *Proc Natl Acad Sci U S A* **108**, 3665-3670 (2011).
10. Gregorieff, A., Liu, Y., Inanlou, M.R., Khomchuk, Y. & Wrana, J.L. Yap-dependent reprogramming of Lgr5(+) stem cells drives intestinal regeneration and cancer. *Nature* **526**, 715-718 (2015).
11. Munoz, J. *et al.* The Lgr5 intestinal stem cell signature: robust expression of proposed quiescent '+4' cell markers. *EMBO J* **31**, 3079-3091 (2012).
12. Haber, A.L. *et al.* A single-cell survey of the small intestinal epithelium. *Nature* **551**, 333-339 (2017).
13. Yui, S. *et al.* YAP/TAZ-Dependent Reprogramming of Colonic Epithelium Links ECM Remodeling to Tissue Regeneration. *Cell Stem Cell* **22**, 35-49 e37 (2018).
14. Wang, P. *et al.* Global analysis of H3K4 methylation defines MLL family member targets and points to a role for MLL1-mediated H3K4 methylation in the regulation of transcriptional initiation by RNA polymerase II. *Mol Cell Biol* **29**, 6074-6085 (2009).
15. Mustata, R.C. *et al.* Identification of Lgr5-independent spheroid-generating progenitors of the mouse fetal intestinal epithelium. *Cell Rep* **5**, 421-432 (2013).

### Supplementary figure legends

#### Suppl. Fig. 1: Characterization of *NICD/p53*<sup>-/-</sup> mutant organoids

A) Western blot for NICD and p53 from protein lysates of *NICD/p53*<sup>-/-</sup> organoids and controls. B) Brightfield and fluorescence images for NICD-GFP of *NICD/p53*<sup>-/-</sup> organoid 5 days after Cre-mediated recombination. NICD-GFP production in selected *NICD/p53*<sup>-/-</sup> organoid (3D reconstruction, on the right), upper part: Sketch visualizing the generation of *NICD/p53*<sup>-/-</sup> organoid. C) Electron microscopy of *NICD/p53*<sup>-/-</sup> organoids shows microvilli at the apical surface on the organoid inside, see also magnification on the right. Inset below and enlargements on the right show cell-cell junctions with interdigitations in the middle, lateral tight-junctions close to the apical side of the organoids and desmosomes (yellow asterisks); scale bar 2µm. D) Confocal immunofluorescence shows strong staining of phalloidin-positive actin at the apical inside of *NICD/p53*<sup>-/-</sup> organoid cells. E) Tracing of control and *NICD/p53*<sup>-/-</sup> organoid cultures for 4 days in full medium (ENR) and after growth factor withdrawal (-ENR). F) Organoids of either *NICD* or *p53* mutant organoids in full medium (upper) or after withdrawal of Rspodnin (lower). G) Tracing of *NICD/p53*<sup>-/-</sup> organoids treated with ICG-001 for three days and assessment of viability by counting growing and normally shaped organoids (on the right). H) Relative expression of secretory cell markers in control and *NICD/p53*<sup>-/-</sup> organoids assessed by qRT-PCR. I) Immunofluorescence staining on sections of formalin-fixed and paraffin-embedded organoids for goblet cells (Intestinal Trefoil Factor, ITF, red arrows), enteroendocrine cells (Chromogranin A, ChroA, green arrow) and Paneth cells (Lysozyme, red arrow); controls in upper panel and *NICD/p53*<sup>-/-</sup> mutants in lower panel; scale bar 50 µm. J) Heat map of stem cell genes differentially regulated in *NICD/p53*<sup>-/-</sup> organoids.

#### Suppl. Fig. 2 High nuclear Yap controls growth and viability of *NICD/p53*<sup>-/-</sup> tumors and organoids

A) Volcano plot of genes differentially regulated in *NICD/p53*<sup>-/-</sup> organoids with indicated genes downregulated in Yap-expressing organoids. B) Immunohistochemistry for active Yap on paraffin sections of *NICD/p53*<sup>-/-</sup> tumor, scale bar 100µm. C) Brightfield image of 3 day-tracked untreated (upper panel) and 2.5µM Verteporfin (VP) treated *NICD/p53*<sup>-/-</sup> organoids (lower panel), scale bar 250µm. D) Concentration-dependent viability of *NICD/p53*<sup>-/-</sup> organoids treated with VP. E) Yap mRNA expression in shctr and shYap *NICD/p53*<sup>-/-</sup> organoids, assessed by qRT-PCR. F) Left: tracking of individual organoids after doxycycline-induced shRNA knock-down of Yap. After induction, organoids express turboRFP, which shows shRNA production, scale bar 250µm Right: quantification of size increase of individually tracked organoids, normalized to the size of organoids before induction.

#### Suppl. Fig. 3: *Stat3* signaling in *NICD/p53*<sup>-/-</sup> organoids

A) Volcano plot of genes differentially regulated in *NICD/p53*<sup>-/-</sup> organoids with indicated genes controlled by *Stat3*. B) Concentration dependent viability of *NICD/p53*<sup>-/-</sup> organoids treated with PP2. C) Western blot of wt small intestinal (upper) and *NICD/p53*<sup>-/-</sup> (lower) organoids upon Src- (PP2, 20µM) or Mst-kinase (XMU-01, 5µM) inhibition. D) Western blot of protein lysates from VP treated *NICD/p53*<sup>-/-</sup> organoids;

Yap inhibition reduced phospho-Erk levels while phospho-Mek levels remained unchanged. Quantification on the right. E) Relative mRNA expression of Yap target genes, comparing untreated and MAPK inhibitor treated *NICD/p53*<sup>-/-</sup> organoids.

*Suppl.Fig.4: Mll1 in NICD/p53<sup>-/-</sup> tumors*

A) Immunofluorescence staining of small intestinal crypt for active Yap, scale bar 30µm. Immunohistochemistry for B) Mll1 and C) H3K4me3 on paraffin sections of *NICD/p53*<sup>-/-</sup> tumors, scale bar 100µm. D) Western blot of control and *NICD/p53*<sup>-/-</sup> organoids probed for the histone tri-methyltransferase complex components Mll1, Mll2, Wdr5 and Ash2l. E) Relative mRNA expression of Mll1 and Mll2 in control and *NICD/p53*<sup>-/-</sup> organoids, assessed by qRT-PCR. F) Scheme of Mll1 and interaction partners in the complex, enzymatic SET H3K4 methyltransferase domain on the right (shown by red arrow below is also the histone tri-methylation), interaction with β-catenin-Tcf4 via CBP in the middle, and Menin-binding domain on the left. Shown is the proteolytically cleaved Mll1, which is disulfide-linked. The Menin inhibitor MI-2 blocks the interaction of Menin with Mll1. G) 3D reconstruction of H3K4me3 (red) and DAPI (blue) in whole-mount immunofluorescence of untreated and MI-2 treated *NICD/p53*<sup>-/-</sup> organoids; scale bar 20µm, magnifications of insets on the right. Quantification of fluorescence intensities on the far right (n, 500 nuclei of 6 organoids were counted). H,I) Immunofluorescence of; H3K4me1 (red) or H3K4me2 (red) and DAPI (blue), magnification of insets on the right; scale bar 20µm. Quantification of fluorescence intensities at the far right (n, 500 nuclei counted from 6 organoids). J) Immunofluorescence staining on paraffin sections of untreated and MI-2 treated *NICD/p53*<sup>-/-</sup> organoids for Ki67 and DAPI (red and blue), magnification of insets on the right; scale bar 20µm. Quantification of fluorescence intensities on the far right.

*Suppl.Fig.5 High YAP and MLL1 in patient-derived xenografts and organoids*

Immunohistochemistry for A) YAP and for B) MLL1 on paraffin sections of patient-derived xenografts (PDX) (n, 8) C) Disease and progression free survival analysis (Kaplan-Meier plot) using the Colorectal Adenocarcinoma (TCGA, PanCancer Atlas) and the web-based tool at <https://www.cbioportal.org>, MLL1 Exp>1.5 or 2, respectively. E) Correlation analysis of TCGA colon cancer expression data for MLL1 and YAP. F) Selection of genes co-expressed with MLL1 in colon cancer, determined by correlation analysis of TCGA colon cancer expression data. G) Brightfield images of human naïve wt (upper) and PDOs (lower) after 4 days treatment with 10µM Nutlin3a (middle) and 10µM Notch inhibitor (DAPT) (right), scale bar 40µm. H) Relative mRNA expression of Notch responsive genes comparing naïve wt and PDOs upon Notch inactivation with DAPT. I) Brightfield images of individual 3 day-tracked untreated (upper panel) and 15 µM DAPT-treated patient-derived organoids (lower panel), scale bar 500µm. J) Western blot from lysates of untreated and DAPT-treated (Notch-inhibited) patient-derived organoids probed for active and total YAP, pErk and Erk. K) Immunofluorescence for MLL1 (green) of patient-derived and wt human organoids, scale bar 50 µm, quantification below (comparison of two individual organoid lines of each condition, and measured a total of 8 organoids).

*Suppl. Fig. 6 High YAP and MLL1 in patient-derived organoids*

A) Brightfield images of individual 3 day-tracked control (upper) and Verteporfin-treated (lower) patient-derived organoids, scale bar 500µm B) H3K4me3 whole-mount immunofluorescence of untreated and MI-2-treated patient-derived organoids,

quantification of fluorescence intensities on the right (n, >2000 nuclei of organoids were measured). C) Human naïve wt colon organoids untreated (left) and 3 day 1.5 $\mu$ M MI-2 treated (right). D) 24h MI-2 treatment of PDOs reduced Yap target gene expression. E) Non-induced patient-derived organoids (upper two panel) and organoids with doxycycline-induced knock-down of MLL1 (lower two panel) at 1 and 8 days after shMLL1 induction.



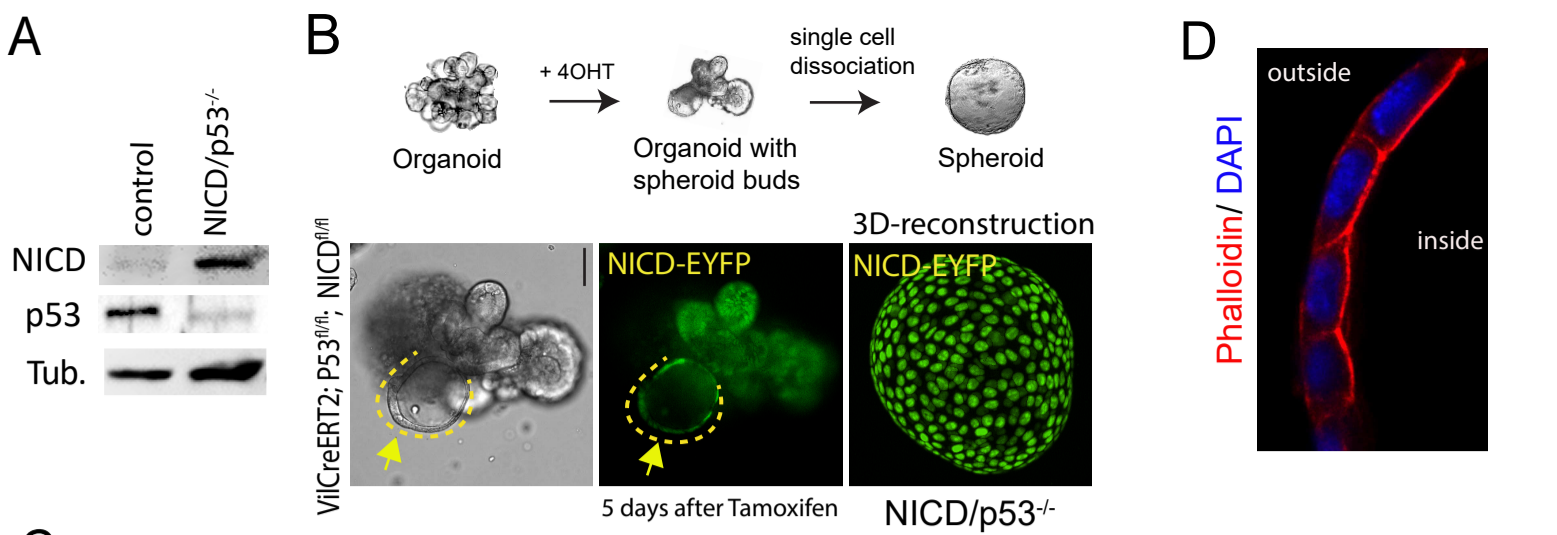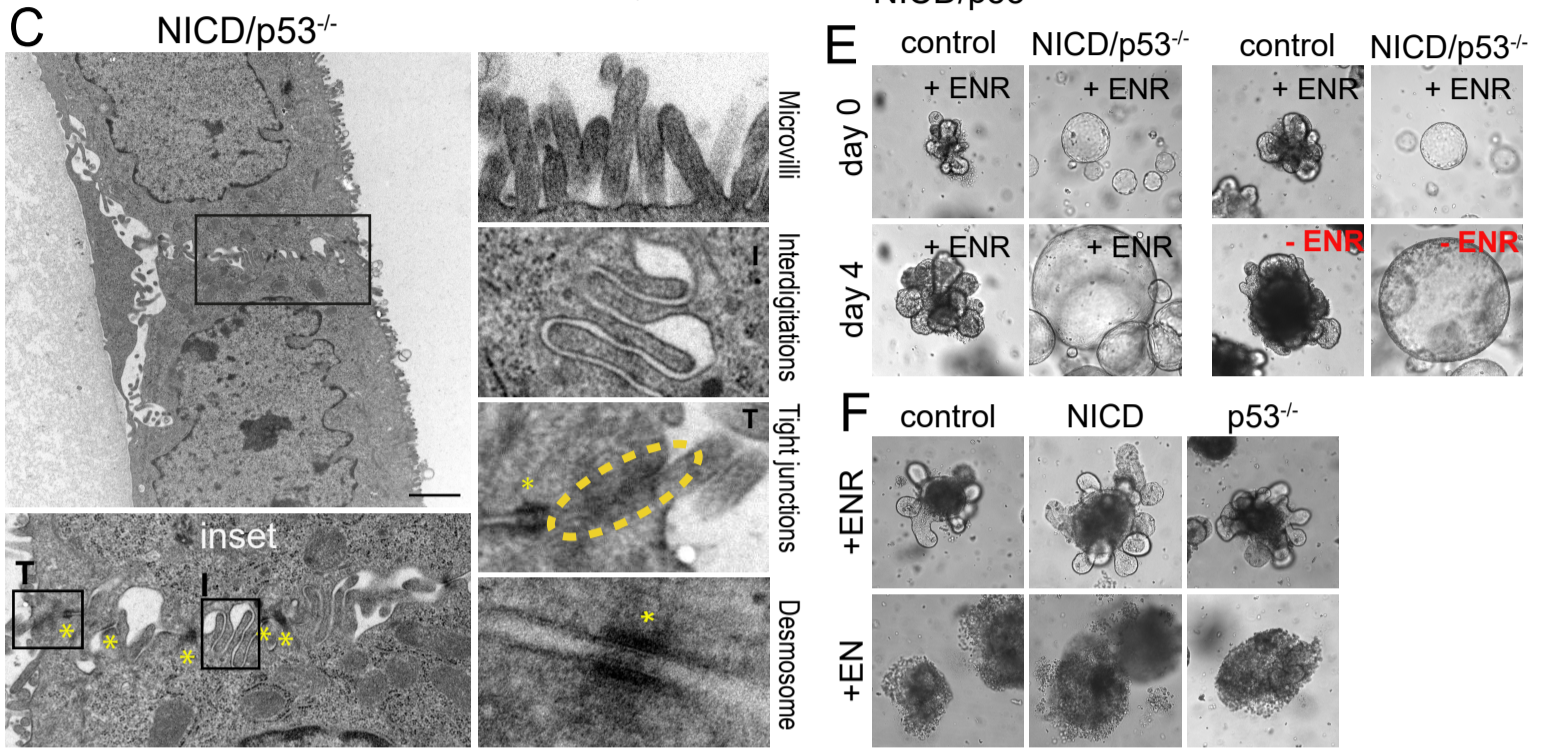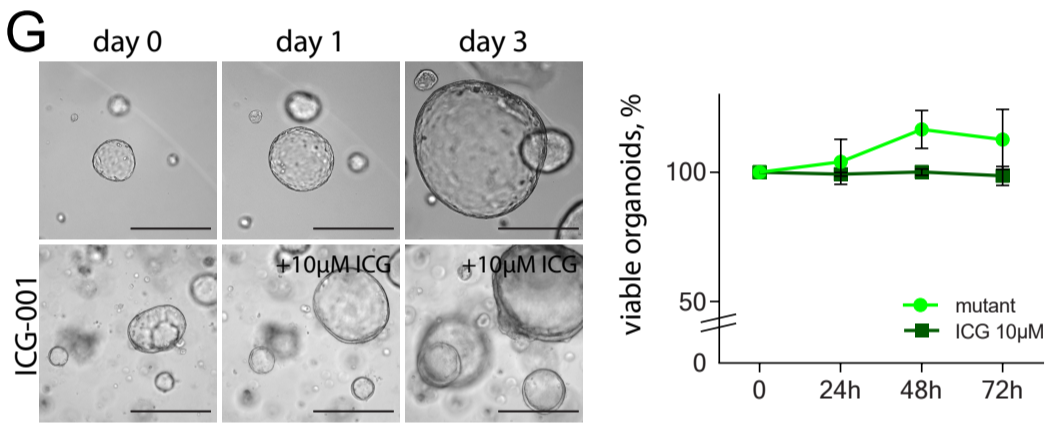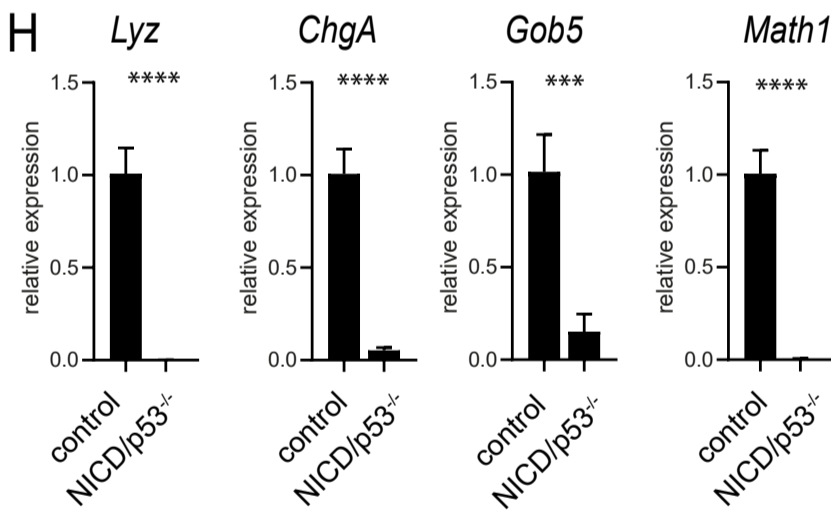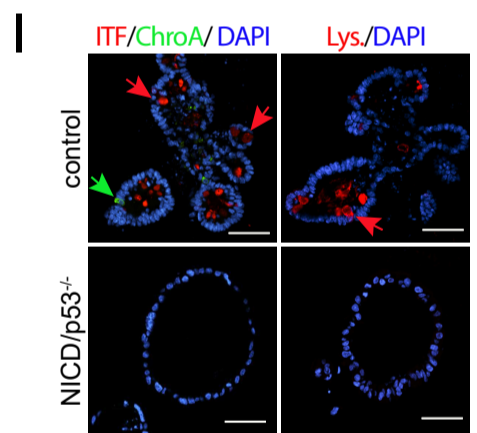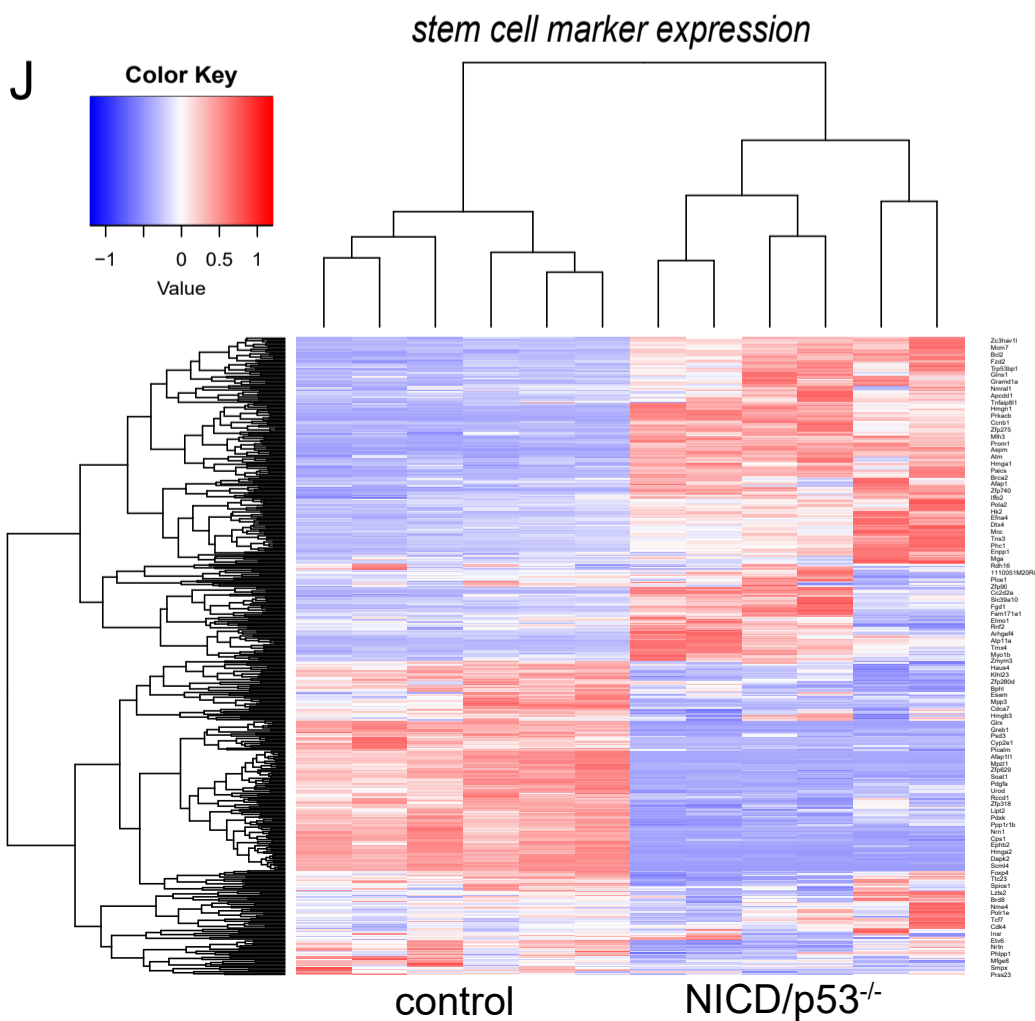

**A** Yap down regulated genes

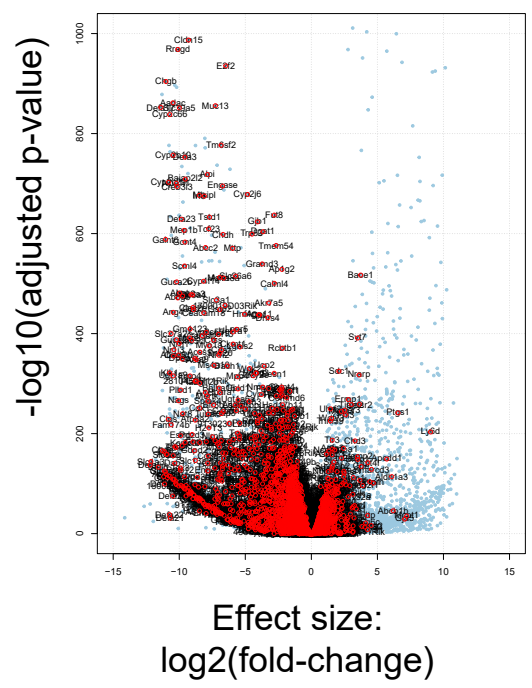

**B** NICD/p53<sup>-/-</sup> (Tumor)

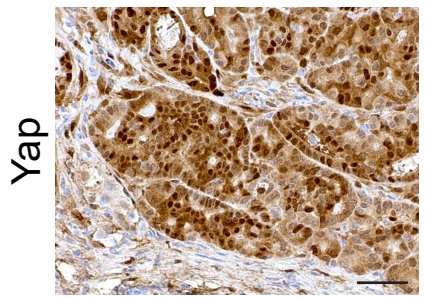

**C**

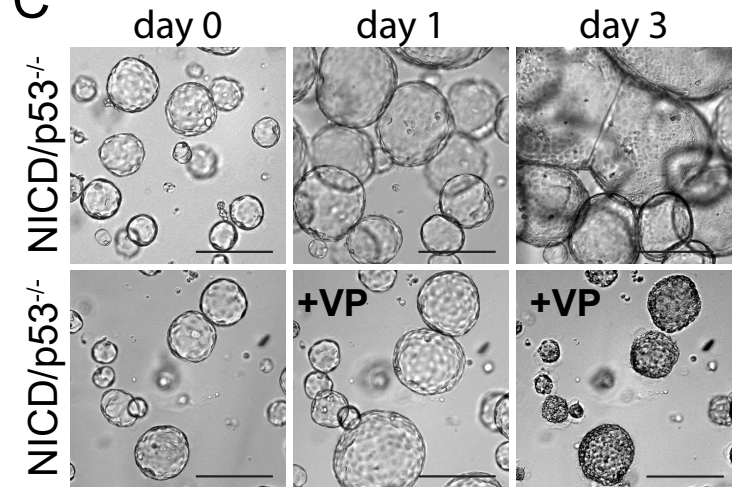

**D**

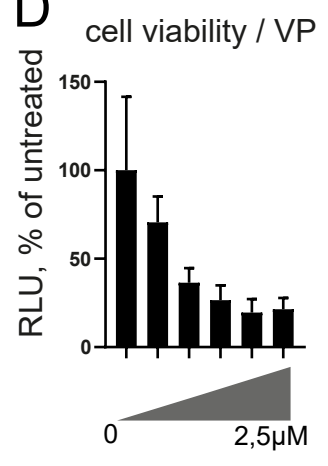

**E**

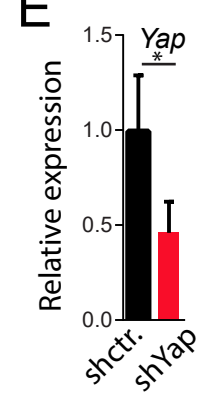

**F**

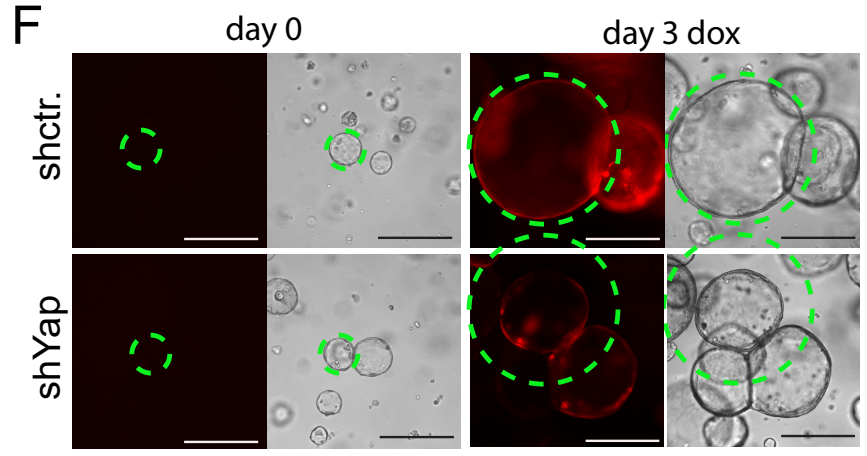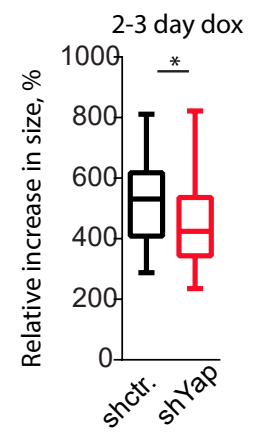

suppl. Fig. 2, Heuberger et al. 2021

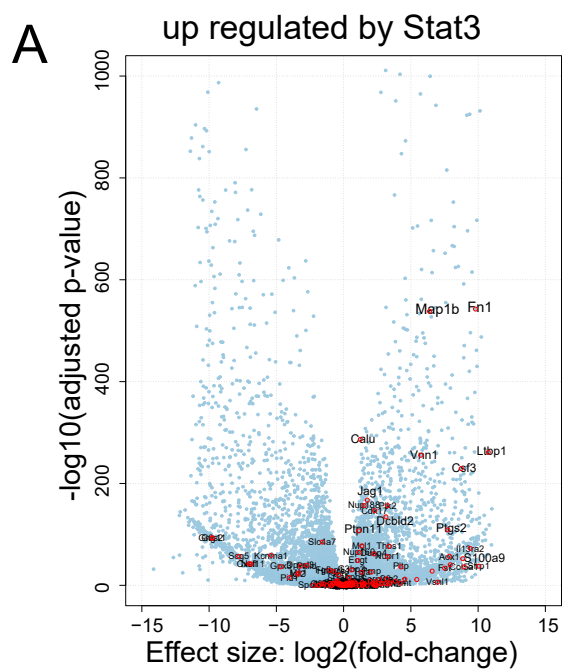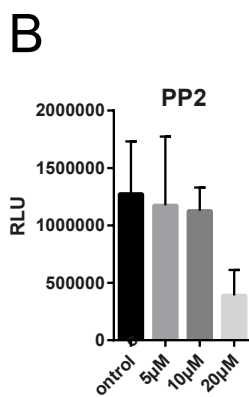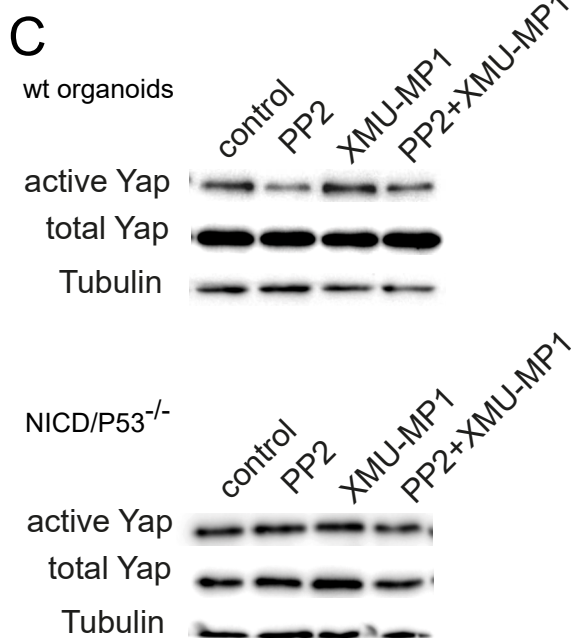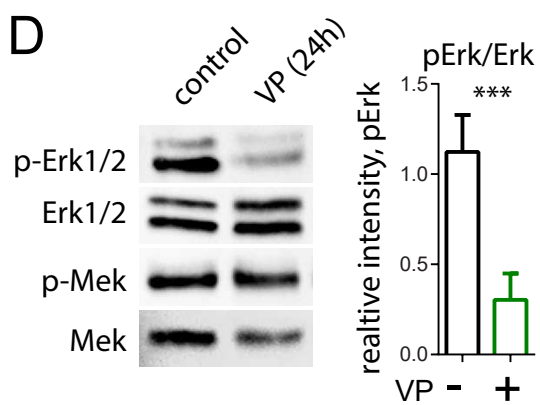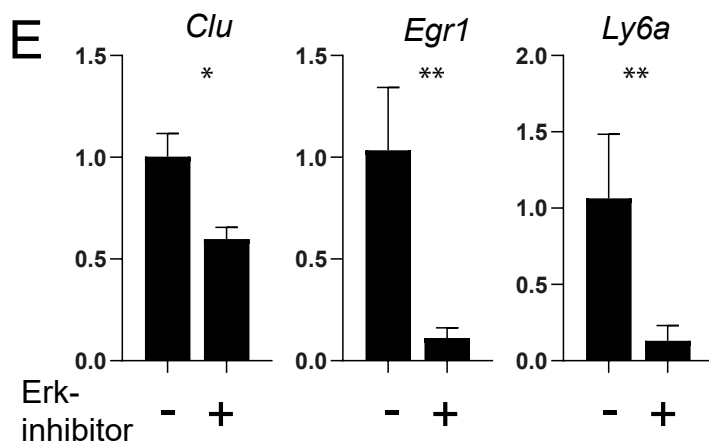

suppl. Fig. 3, Heuberger et al. 2021



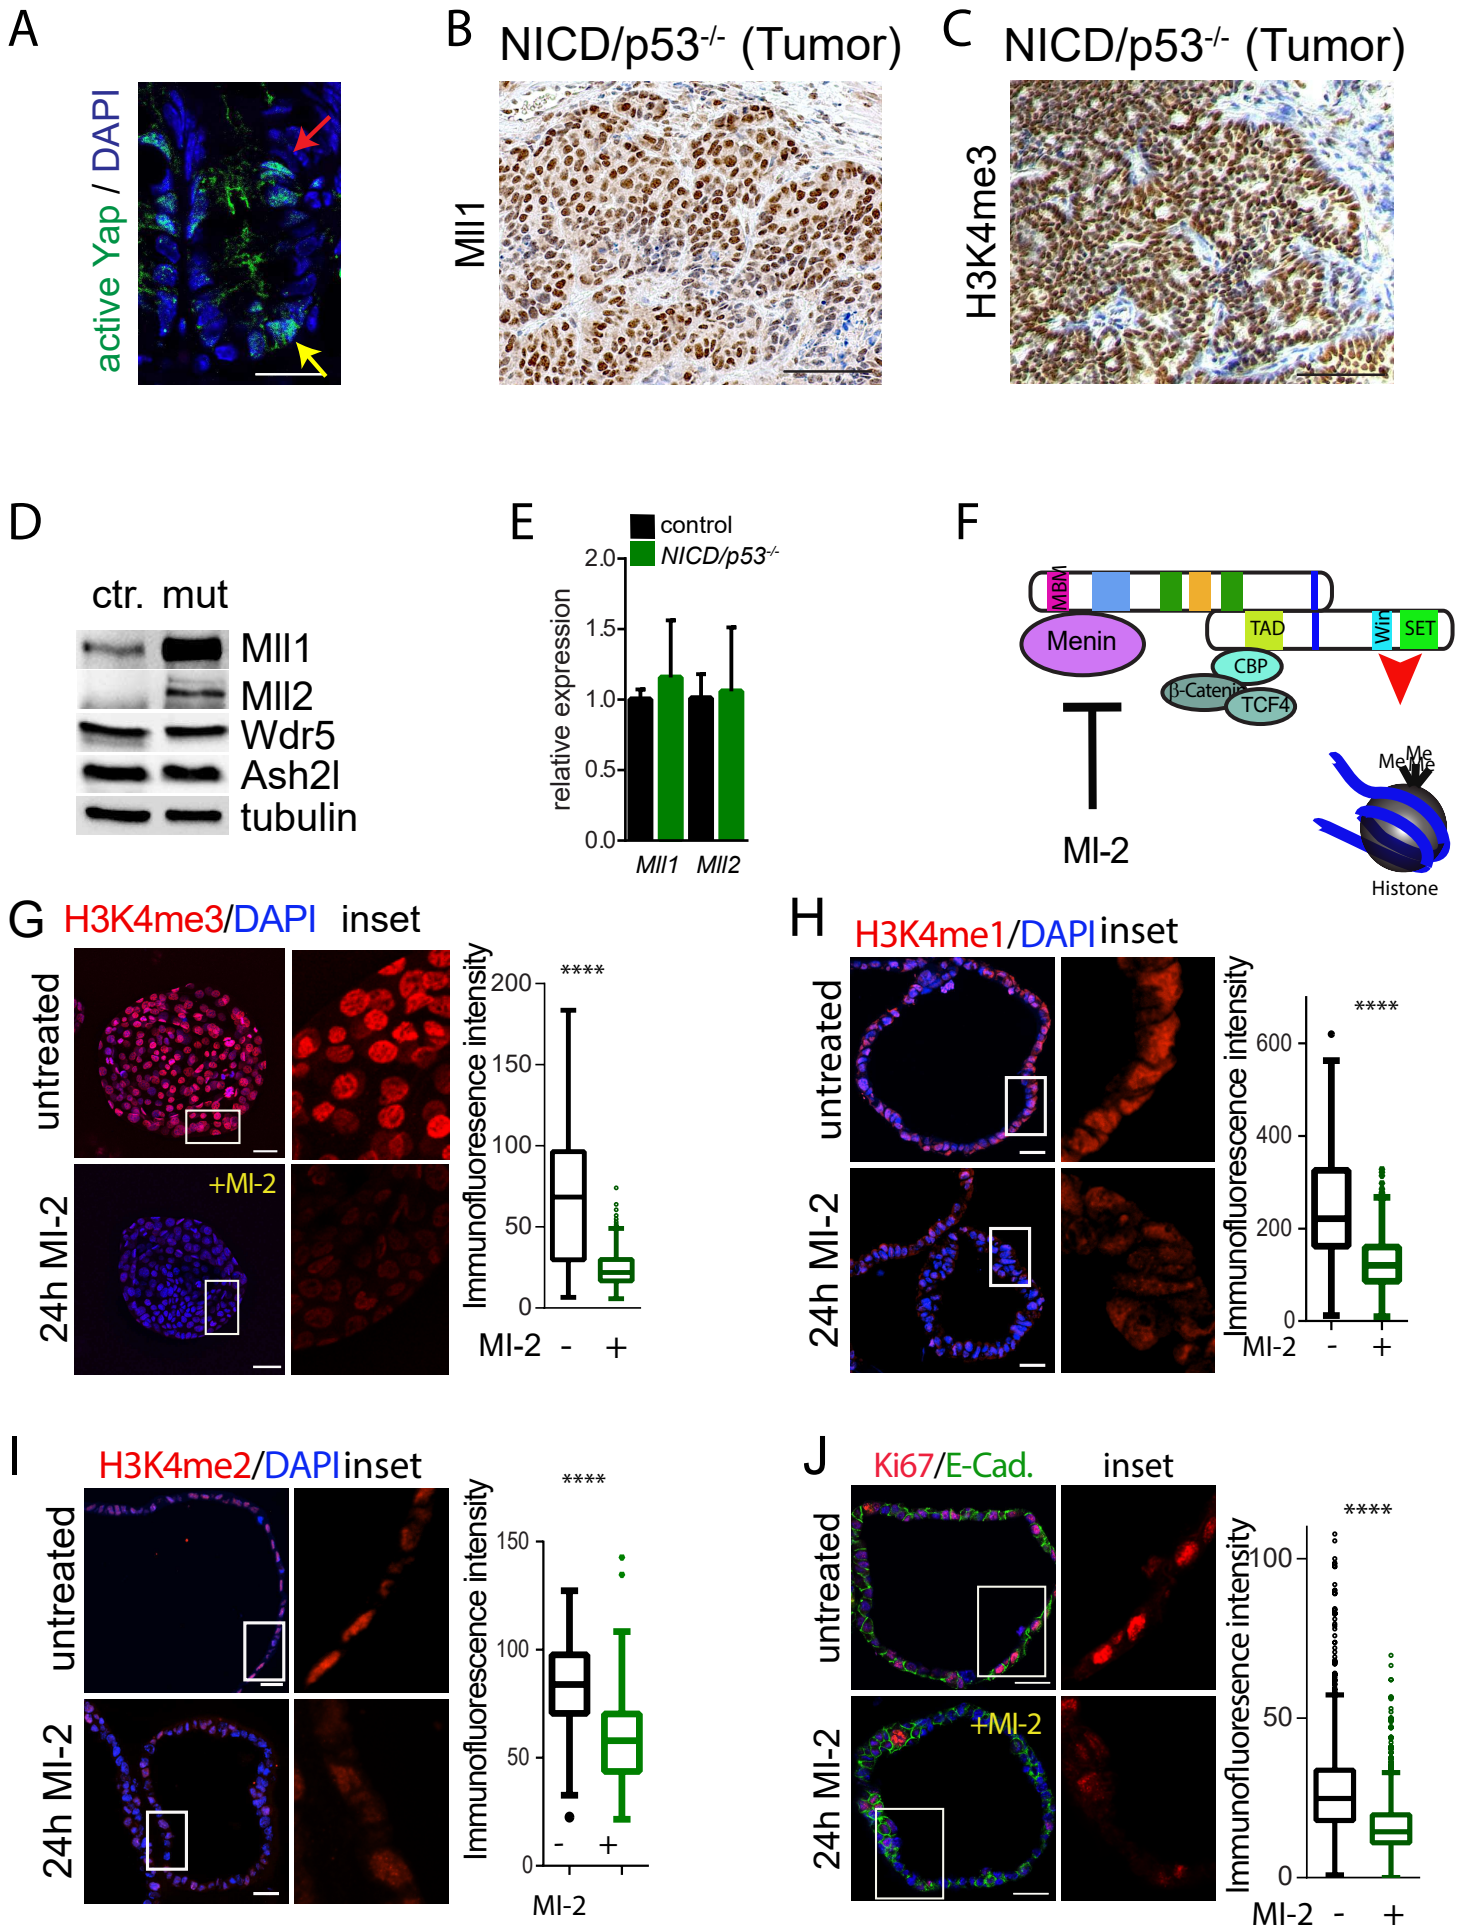

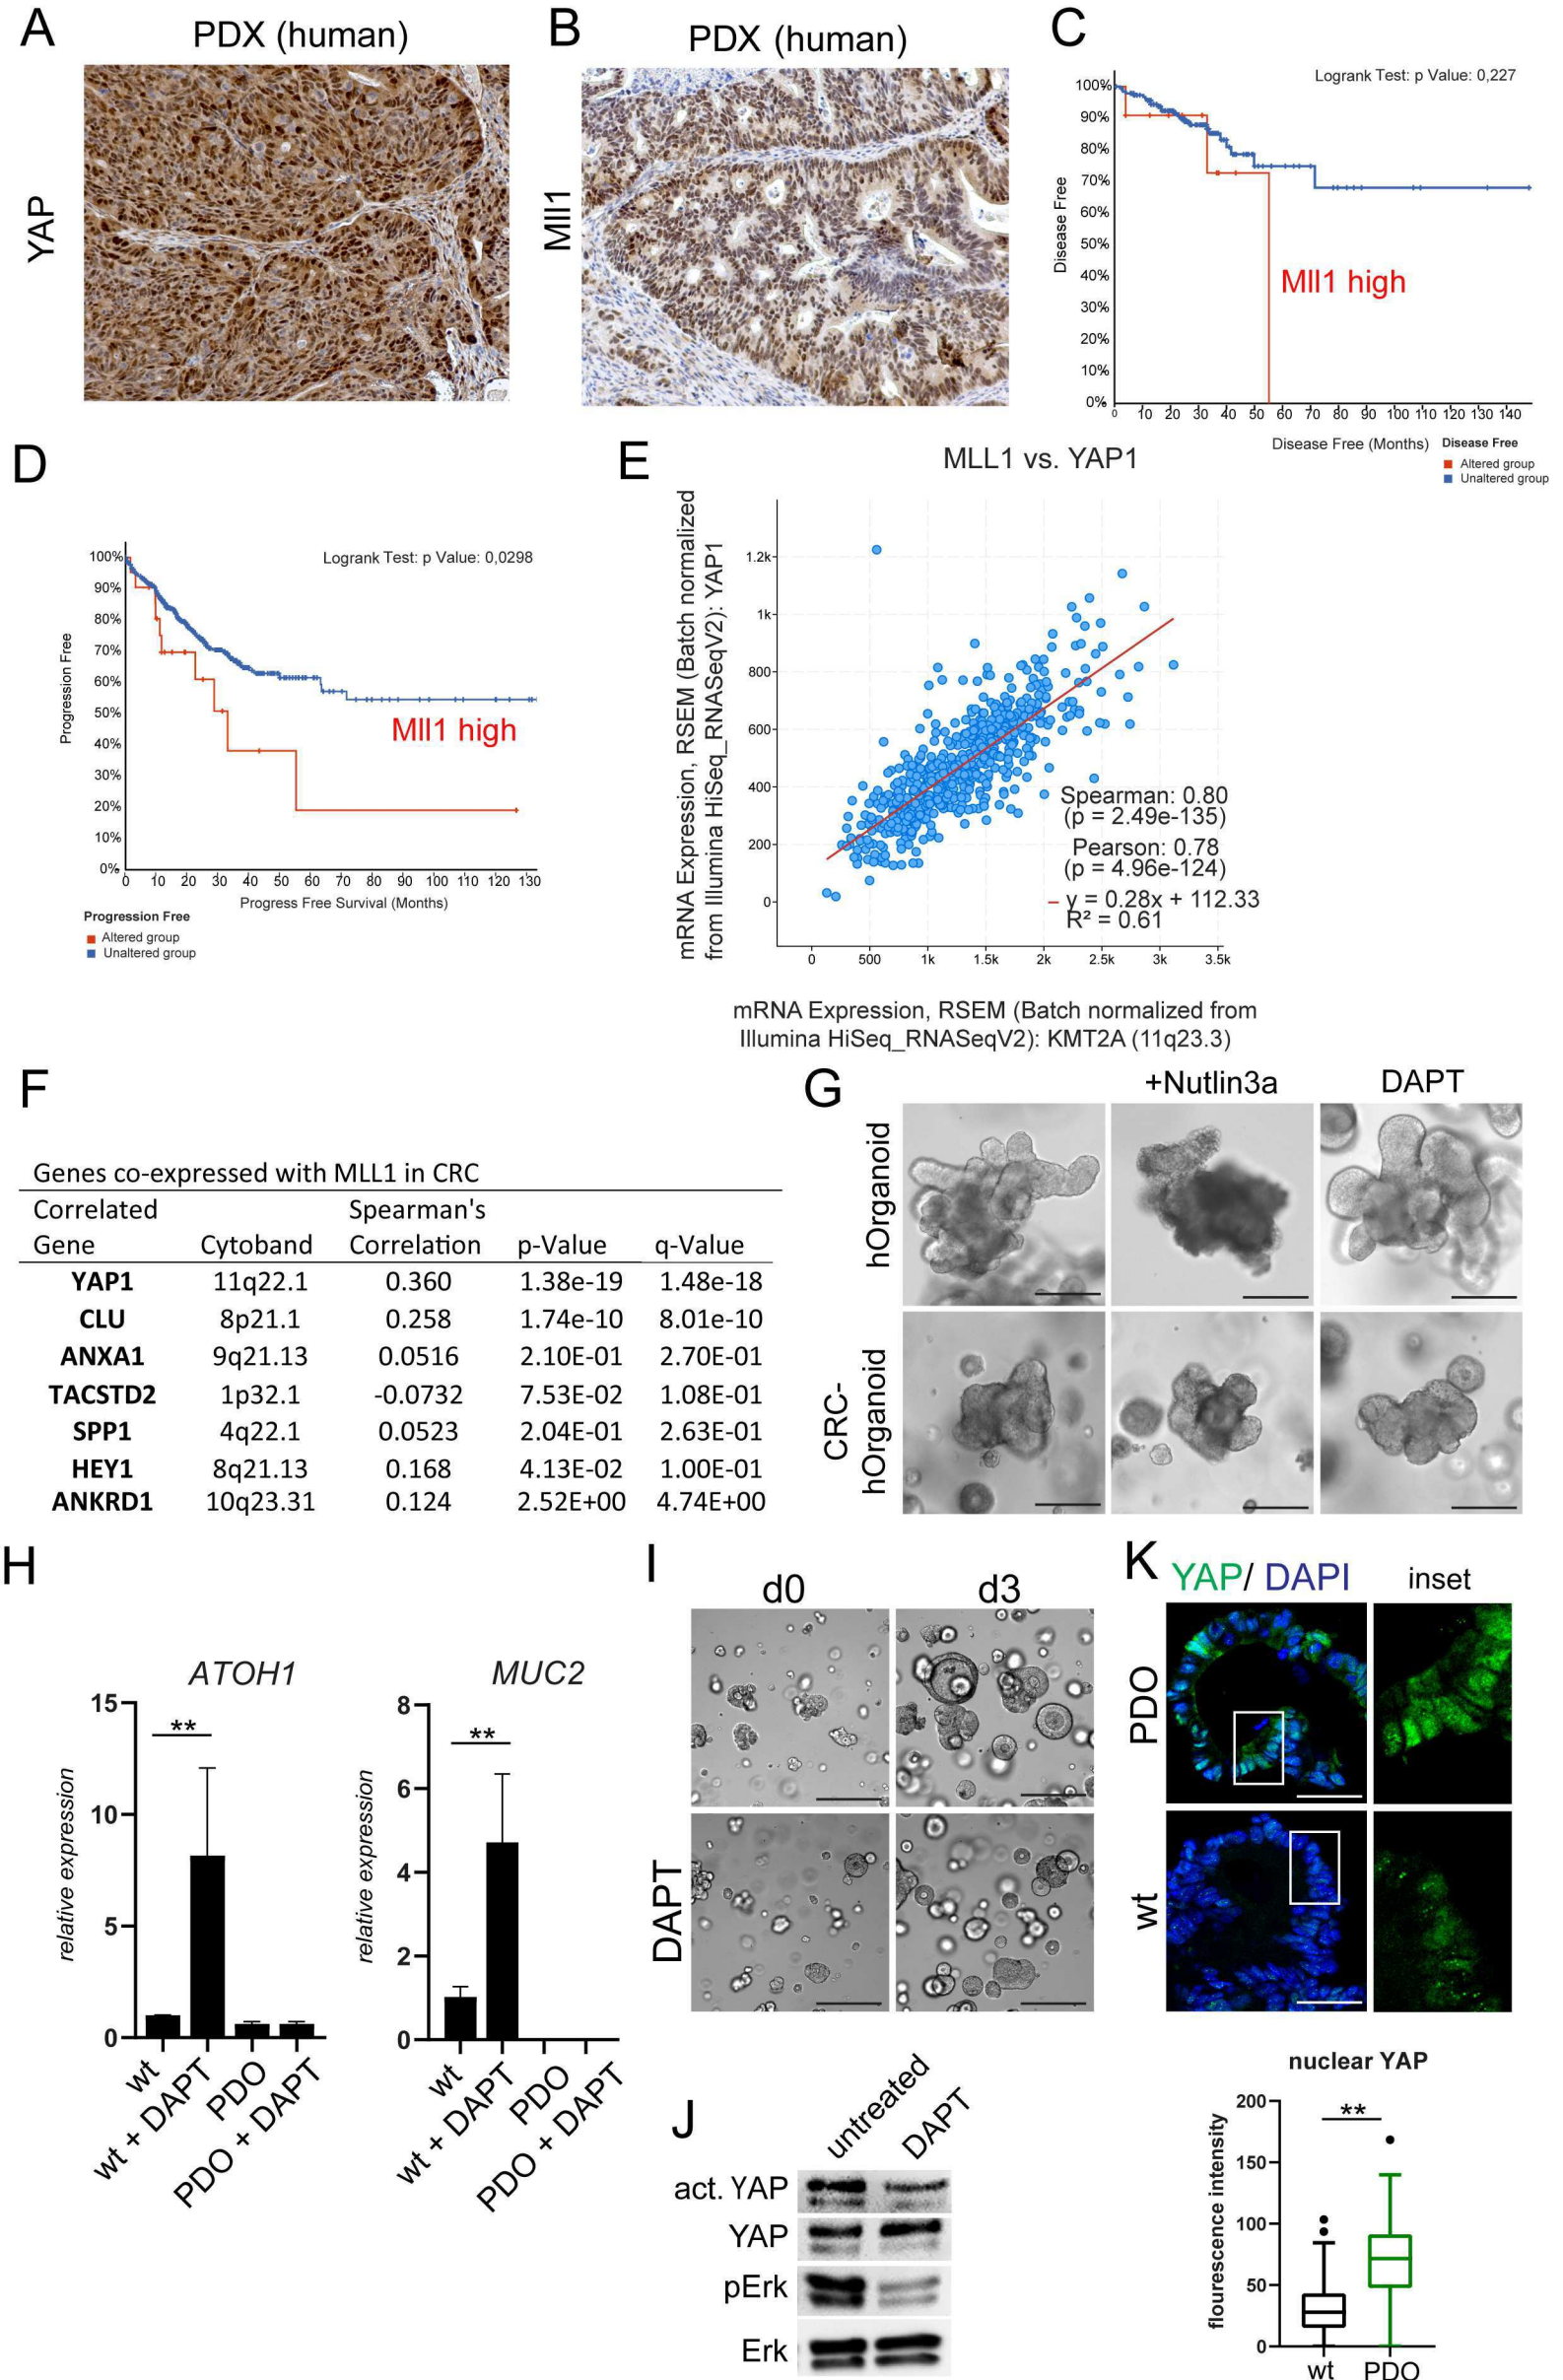



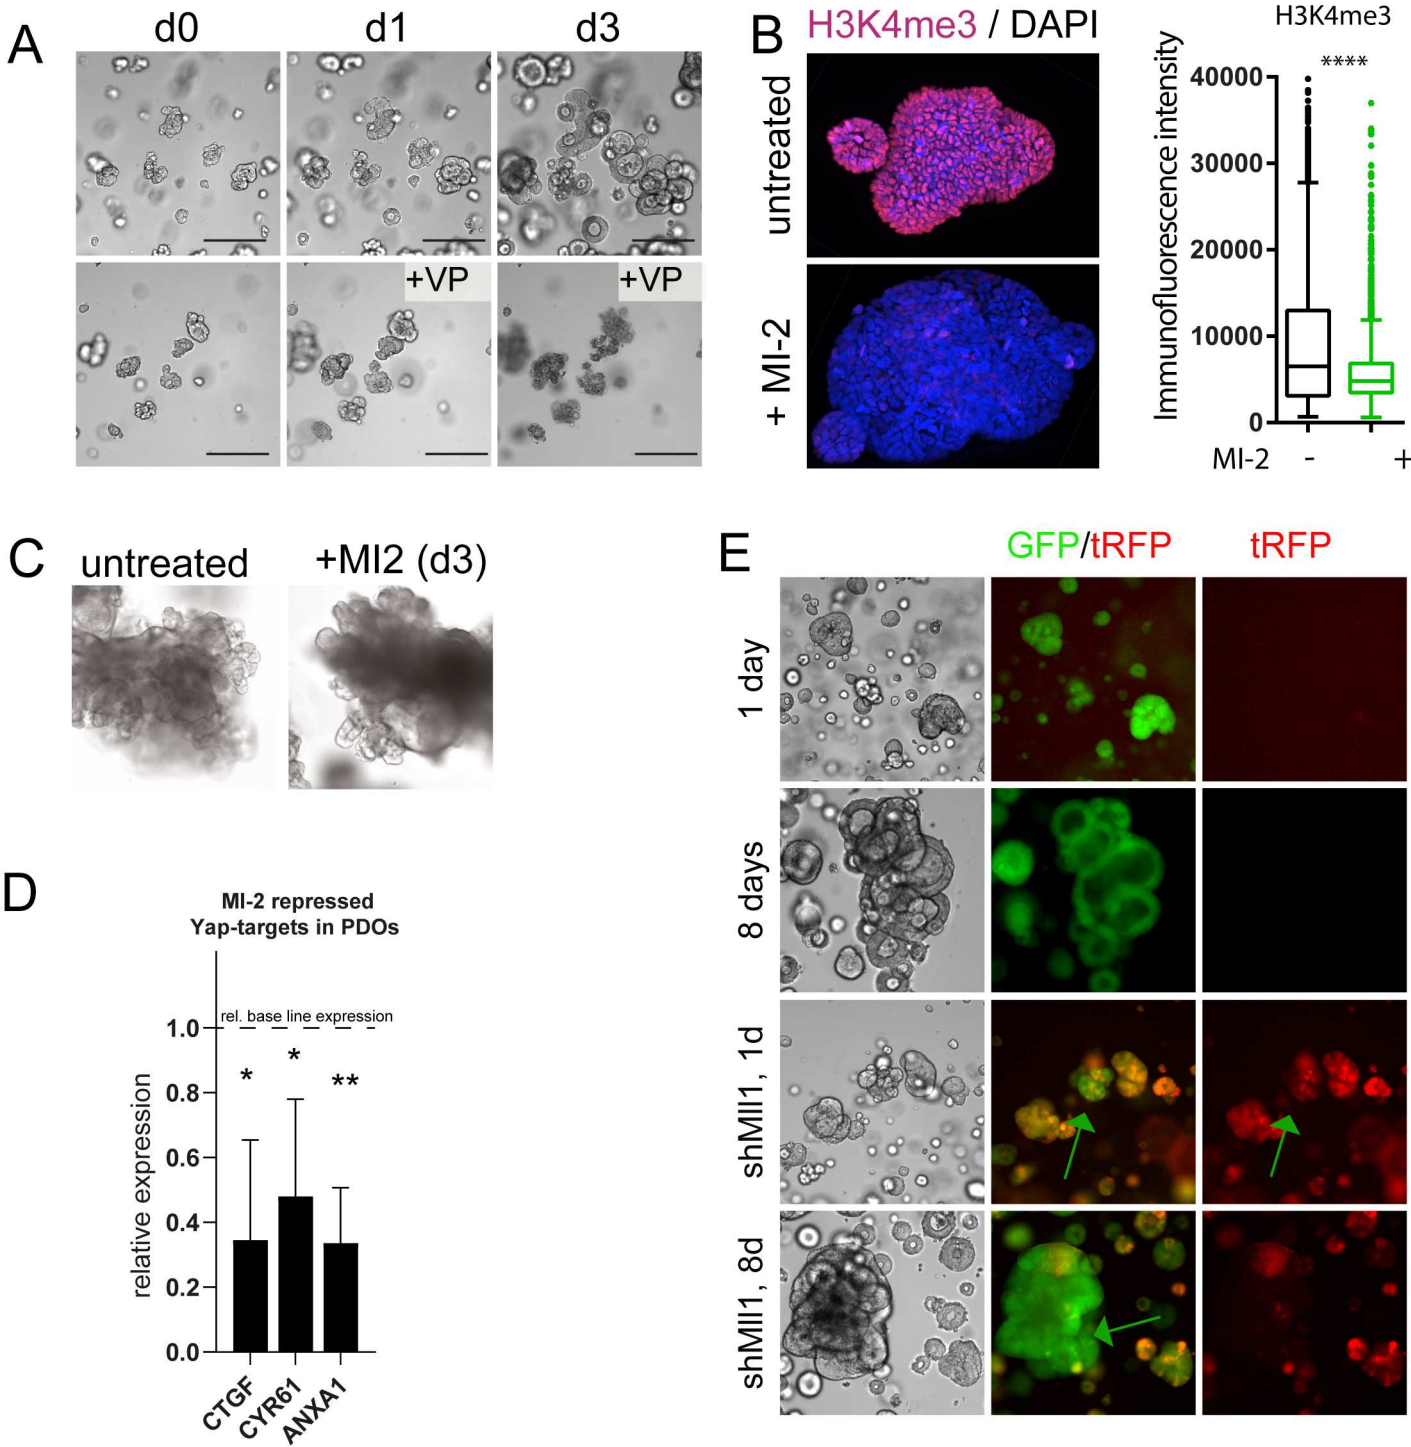

Supplement: pnas.2019699118.sapp.pdf [file pnas.2019699118.sapp.pdf]
